# Supplementary material for: Genomic Variability in the Neuraminidase Gene and Antiviral Resistance of Influenza A(H1N1)pdm09 Virus Isolated from Acute Respiratory Infection Patients in Shiraz, Iran (2023–2024)
Source: Research Square preprint supplement (doi:10.21203/rs.3.rs-6495442/v1), 2025-05-05
Supplement: Supplementary file 1 [file ee375e2f561e8500b4cd3a86.docx]

**Supplementary figure 1. Validation of I-TASSER Model for Neuraminidase Structure. (A) Ribbon Diagram of Neuraminidase Crystal Structure (2hu4). (B) I-TASSER Modeled Structure. (C) Superimposition of I-TASSER Model with 2hu4**

| 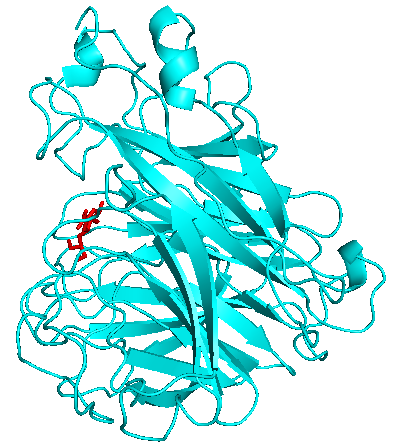a | 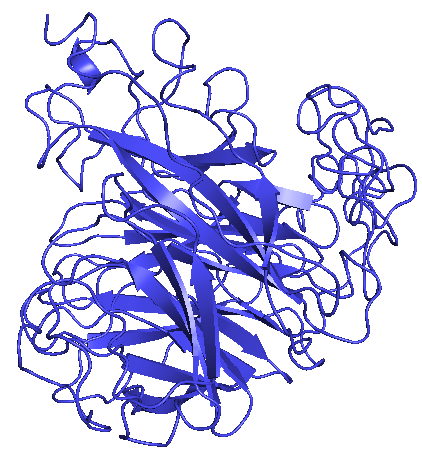b |
| --- | --- |
| 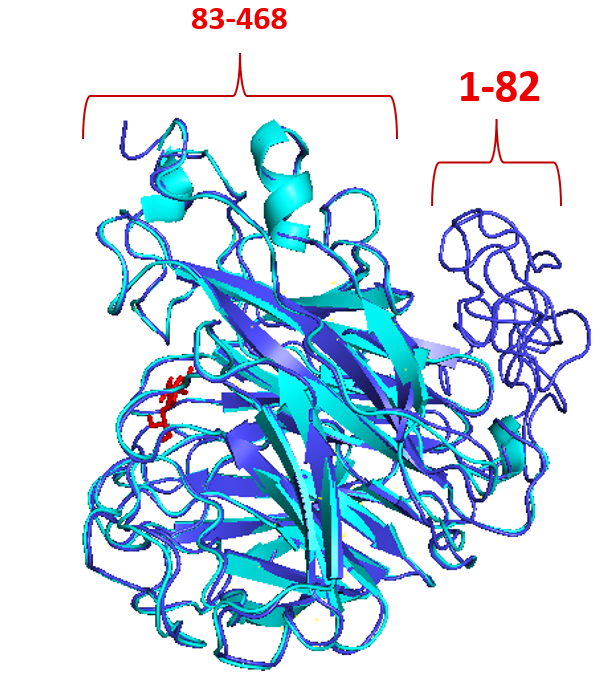  c | |
